# Supplementary material for: Rapid Extraction Method of Mycobacterium ulcerans DNA from Clinical Samples of Suspected Buruli Ulcer Patients
Source: Diagnostics (Basel). 2019 Nov 26;9(4):204. doi: 10.3390/diagnostics9040204 (PMC6963521; doi:10.3390/diagnostics9040204)
Supplement: Supplementary file 1 [file diagnostics-09-00204-s001.xlsx]

## Sheet: Sheet1
															Genolyse					Puregene
ID	Health Facility	Age	Sex	Lesion type	Category	Location	sample types	PCR	CT_CLS	Geno_PCR	CT_Gen.	RPA	TT	CLS - PCR	PCR	RPA	DNA Conc	OD260	OD260/280	PCR (CT)	RPA	DNA Conc (ng/ul)	OD260	OD260/280
R1	Agogo	83	Male	ulcer	III		Swab							Positive	Negative	negative	290.97	5.82	0.62	Negative	negative	4.298	0.13	1.879
R2	Agogo	11	Male	ulcer	III		Swab							Positive	Positive (22.65)	Positive	374.5	7.49	0.72	Positive (25.04)	positive	5.93	0.179	1.876
R3	Dunkwa	5	Female	ulcer	II		Swab							Positive	positive (36.12)	Negative	264	5.28	0.62	Negative	Negative	4.543	0.138	2.05
R4	Tepa	26	Female	ulcer	III		Swab							Positive	Negative	Positive	330.9	6.62	0.65	Negative	Negative	6.153	0.187	2.394
R5	Agogo	10	Female	ulcer	III		Swab							Positive	Positive (31.18)	Positive	394.68	7.89	0.74	Positive (30.17)	negative	16.12	0.49	1.63
R6	Agogo	52	Male	ulcer	III		Swab							Positive	Positive (37.21)	Positive	292.6	5.85	0.62	Positive (25.04)	Negative	6.223	0.189	1.95
R7	Agogo	3	Female	Nodule	I		FNA							Positive	Positive 31.59)	Negative	215.5	4.3	0.65	Positive (29.84)	Positive	4.32	0.1308	1.64
R8	Tepa	13	Female	oedema	I		FNA							Positive	Positive (33.99)	negative	236.6	4.73	0.61	Positive (33.44)	Positive	2.55	0.077	1.55
R9	Agogo	5	Female	plaque	I		FNA							Positive	Negative	Negative	262.9	5.2	0.76	Positive (38.62)	negative	34.56	1.047	1.765
R10	Agogo	10	Female	plaque	II		FNA							Positive	Negative	Positive	402.8	8.06	0.98	Positive (33.25)	Positive	688.964	20.877	1.856
R11	Agogo	18	Male	plaque	I		FNA							Positive	Positive (28.58)	Negative	173.52	3.47	0.58	Positive (28.81)	Positive	8.244	0.2498	1.68
R12	Agogo	42	Male	Nodule	I		FNA							Positive	Positive (26.60)	Positive	67.43	1.35	0.57	Positive (25.39)	positive	4.448	0.1348	1.763
R13	Agogo	8	Male	ulcer	I		FNA							Positive	Positive (25.60)	Positive	138.3	2.77	0.59	Positive (25.18)	Positive	1.022	0.031	1.003
R14	Agogo	7	Male	plaque	III		FNA							Positive	Positive (29.06)	Positive	30.3	0.61	0.62	Positive (31.31)	Positive	0.645	0.0195	4.219
R15	Agogo	7	Male	plaque	III		FNA							Positive	Positive (26.36)	Positive	179.29	3.59	0.6	Positive (27.35)	Positive	0.484	0.0147	-1.595
R16	Agogo	32	Female	Plaque	II	Lower limb	FNA	Positive	35.07	Positive	34.7	Positive	13.18
R17	Agogo	12	Female	Nodule	I	Lower limb	FNA	Positive	33.58	Positive	33.58	Positive	8.01
R18	Agogo	45	Female	Ulcer	II	Upper limb	swab	Positive	19.7	Positive	26.2	Positive	14.03
R19	Agogo	5	Male	Ulcer	II	Lower limb	swab	Positive	35.05	Positive	34.45	Positive	9.68
R20	Tepa	59	Female	Ulcer	II	Upper limb	swab	Positive	28.7	Positive	24.99	Positive	13.02
R21	Agogo	35	Male	Ulcer	III	Lower Limb	swab	Positive	20.21	Positive	25.55	Positive	13.36
R22	Agogo	6	Male	Plaque	I	Upper limb	FNA	Positive	24.09	Positive	22.61	Positive	10.69
R23	Tepa	52	Female	Ulcer	III	lower limb	swab	Positive	27.2	Negative	NA	Positive	16.36
R24	Tepa	62	Male	oedema	III	Lower limb	FNA	Positive	37.2	Negative	NA	Positive	18.36
R25	Tepa	18	Female	ulcer	I	Lower limb	swab	Negative	NA	Negative	NA	Negative	NA
R26	Tepa	38	male	ulcer	I	Lower limb	swab	Positive	36.01	Negative	NA	Negative	NA
R27	Tepa	37	Female	Ulcer	I	Lower limb	Swab	Positive	22.72	Positive	27.27	Positive	13.02
R28	Agogo	13	male	Nodule	I	Upper limb	FNA	Positive	36.7	Negative	NA	Positive	12.4
R29	Dunkwah	8	Female	ulcer	I	Lower limb	Swab	Positive	26.46	Positive	28.2	Positive	14.38
R30	Agogo	13	female	ulcer	I	Head	Swab	Negative	NA	Negative	NA	Negative	NA
R31	Tepa	60	male	ulcer	II	lower limb	swab	Negative	NA	Negative	NA	Negative	NA
R32	Agogo	9	male	Ulcer	I	lower limb	FNA	Negative	NA	Negative	NA	Negative	NA
R33	Agogo	23	male	Plaque	I	lower limb	Swab	Positive	18.86	Positive	21.93	Positive	10
R34	Agogo	12	Male	Plaque	II	lower limb	swab	Positive	24.38	Positive	27.4	Positive	9
R35	Tepa	13	Female	Plaque	II	Upper limb	FNA	Positive	32.48	Positive	31.25	Positive	14.7
R36	Agogo	35	Female	plaque	II	lower limb	FNA	Positive	32.16	Negative	NA	Negative	NA
R37	Agogo	18	male	Ulcer	III	Upper limb	swab	Positive	32.16	Positive	32.8	Positive	11.36
R38	Agogo	7	female	Plaque	I	lower limb	FNA	Negative	NA	Negative	NA	Negative	NA
R39	Agogo	5	female	Plaque	II	Back	FNA	Positive	24	Positive	24.3	Positive	6.46
R40	Tepa	3	female	ulcer	III	Upper limb	Swab	Negative	NA	Negative	NA	Negative	NA
R41	Agogo	30	Female	plaque	II	Upper limb	FNA	Positive	27.97	Positive	21.43	Positive	10.69
R42	Agogo	50	female	Plaque	I	Lower limb	FNA	Positive	26.6	Positive	24.4	Positive	12.02
R43	Agogo	15	male	plaque	II	Upper limb	FNA	Positive	34.7	Positive	35.55	Negative	NA
R44	Tepa	9	female	ulcer	II	Lower limb	Swab	Positive	20.17	Positive	22.69	Positive	4.69
R45	Tepa	49	male	ulcer	I	Lower limb	Swab	Negative	NA	Negative	NA	Negative	NA
R46	Agogo	46	female	ulcer	II	Lower limb	swab	Positive	19.55	Positive	20.75	Positive	9.02
R47	Agogo	76	female	ulcer	III	Upper limb	Swab	Positive	33.23	Negative	NA	Positive	6.02
R48	Agogo	53	female	Plaque	I	Lower limb	FNA	Negative	NA	Negative	NA	Negative	NA
R49	Tepa	5	female	ulcer	I	Lower limb	swab	Negative	NA	Negative	NA	Negative	NA
R50	Tepa	5	female	ulcer	I	Lower limb	swab	Negative	NA	Negative	NA	Negative	NA
R51	Agogo	25	Male	Plaque	I	Lower limb	FNA	Negative	NA	Negative	NA	Negative	NA
R52	Agogo	26	Female	ulcer	I	Lower limb	swab	Positive	34.6	Negative	NA	Negative	NA
R53	Dunkwah	10	Female	ulcer	I	Lower limb	Swab	Positive	34.1	Positive	34.19	Positive	8.69
R54	Agogo	20	female	ulcer	I	lower limb	FNA	Positive	34.34	Negative	NA	Positive	11.69
R55	Agogo	15	female	ulcer	III	lower limb	swab	Negative	NA	Negative	NA	Negative	NA
R56	Tepa	62	female	ulcer	II	Upper limb	swab	Negative	NA	Negative	NA	Negative	NA
R57	Agogo	5	female	ulcer	I	Buttocks	swab	Positive	26.19	Positive	24.14	Positive	12.40
R58	Agogo	31	male	ulcer and Oedema	III	Upper limb	swab	Positive	31.11	Positive	34.29	Positive	12.60
